# Supplementary material for: Pentamethylcyclopentadienyl Molybdenum(V) Complexes Derived from Iodoanilines: Synthesis, Structure, and ROP of ε-Caprolactone
Source: MDPI journal article supplement (doi:10.3390/catal11121554), 2021-12-20

## **Electronic Supplementary Information**

# **Pentamethylcyclopentadienyl molybdenum(V) complexes derived from iodoanilines: synthesis, structure, and ROP of $\epsilon$ -caprolactone.**

Tian Xing,<sup>a</sup> Mark R. J. Elsegood,<sup>b</sup> Sophie H. Dale<sup>b</sup> and Carl Redshaw<sup>a\*</sup>

<sup>a</sup> *Plastics Collaboratory, Department of Chemistry, The University of Hull, Cottingham Rd, Hull, HU6 7RX, U.K.*

<sup>b</sup> *Chemistry Department, Loughborough University, Loughborough, Leicestershire, LE11 3TU, U.K.*

## **Contents**

**Figure S1.** Alternative views of **1**.

**Figure S2.** Views of the molecular structure of  $[2\text{-I-NH}_3\text{C}_6\text{H}_4]^+\text{Cl}^-$ .

**Figure S3.** Packing of complex **2**·MeCN.

**Figure S4.** Packing views of **3**.

**Figure S5.** Different views of  $[3\text{-I-NH}_3\text{C}_6\text{H}_4]^+\text{Cl}^-$ .

**Figure S6.** Different views of the packing of **4**.

**Figure S7.** Packing of complex **5**.

**Figure S8.** Alternative view and packing of **6**·MeCN

**Figure S9.** Packing of complex **7**.

**Figure S10.** Packing of aniline complex **8**.

**Figure S11.**  $^1\text{H}$  NMR spectrum ( $\text{CDCl}_3$ , 400 MHz, 298 K) of the PCL synthesized with **3**/BnOH at 130 °C under  $\text{N}_2$  (entry 7, Table 1).

**Figure S12.** Mass spectrum of the PCL synthesized with **2**/BnOH (entry 2, Table 1).

**Figure S13.** Mass spectrum of the PCL synthesized with **2**/BnOH (entry 2, Table 2).

**Figure S14.** Mass spectrum of the PCL synthesized with **2**/BnOH (entry 5, Table 3).

**Figure S15.** Kinetics for **8** *versus* **2**.

**Figure S1.** Alternative views of **1**.

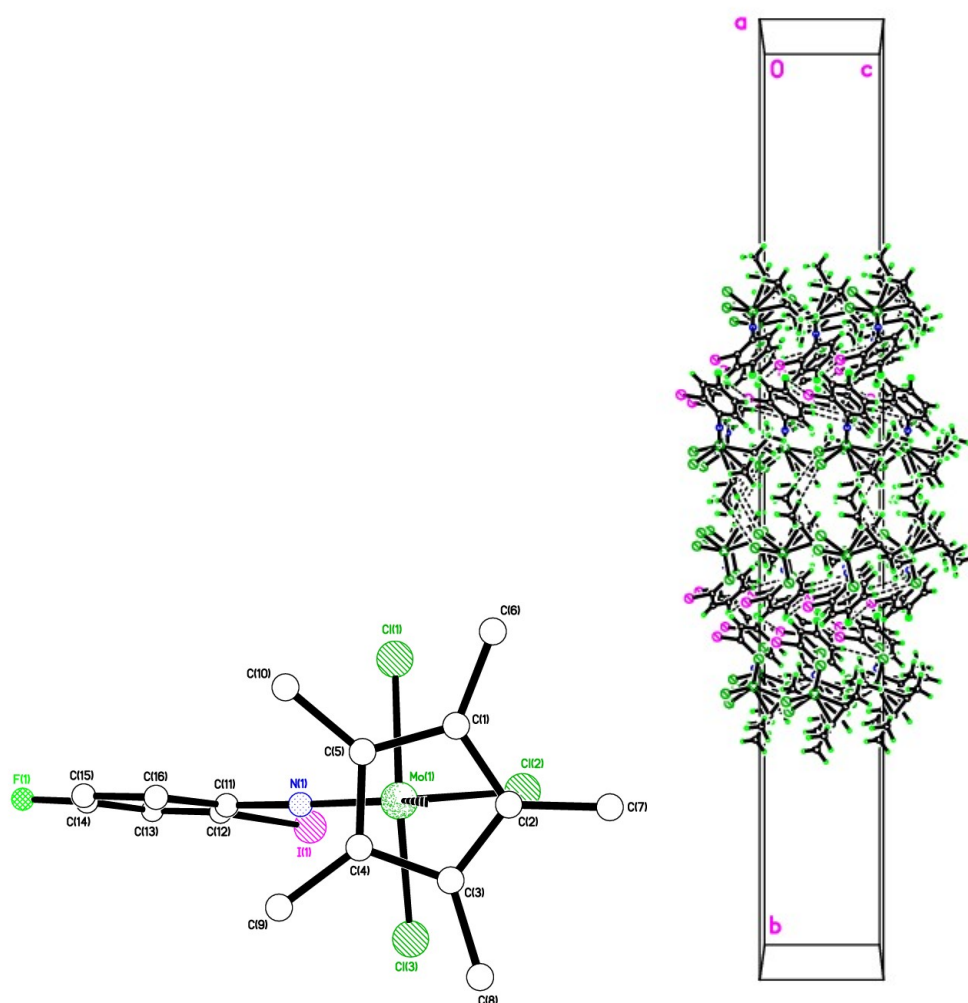

**Figure S2.** Views of the molecular structure of  $[2\text{-I-NH}_3\text{C}_6\text{H}_4]^+\text{Cl}^-$ .

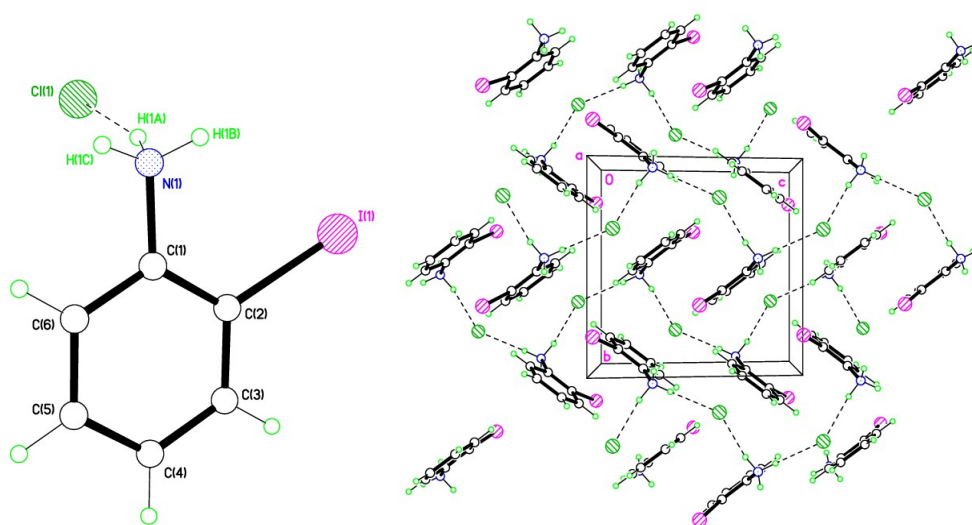

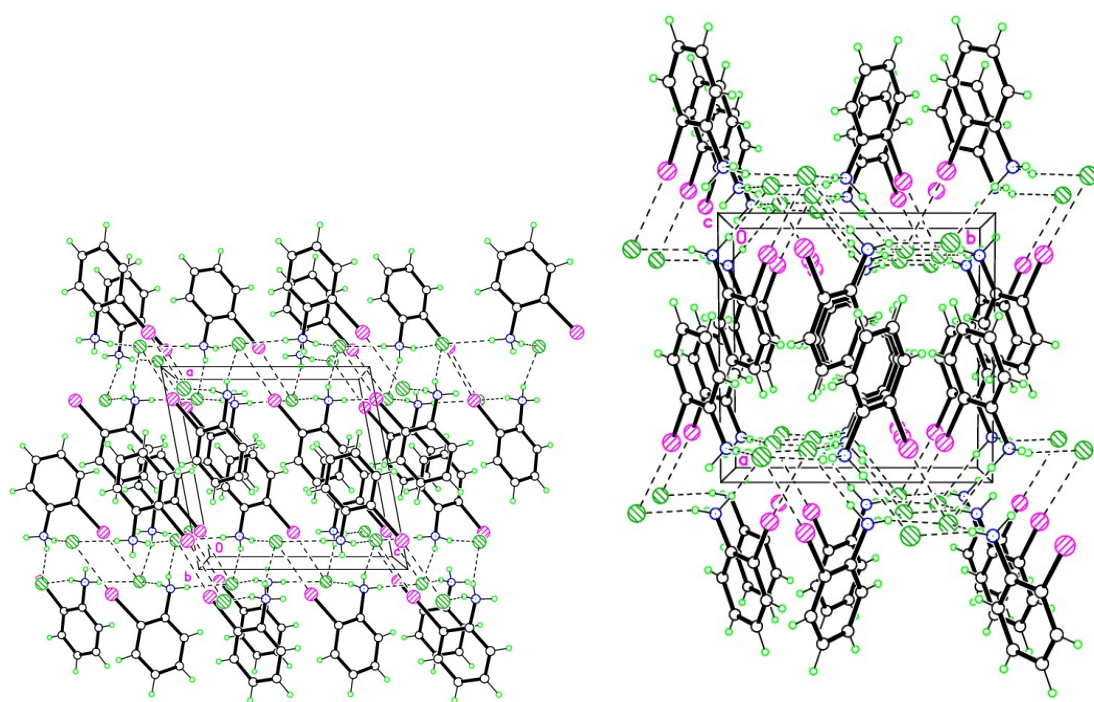

**Figure S3.** Packing of complex 2·MeCN.

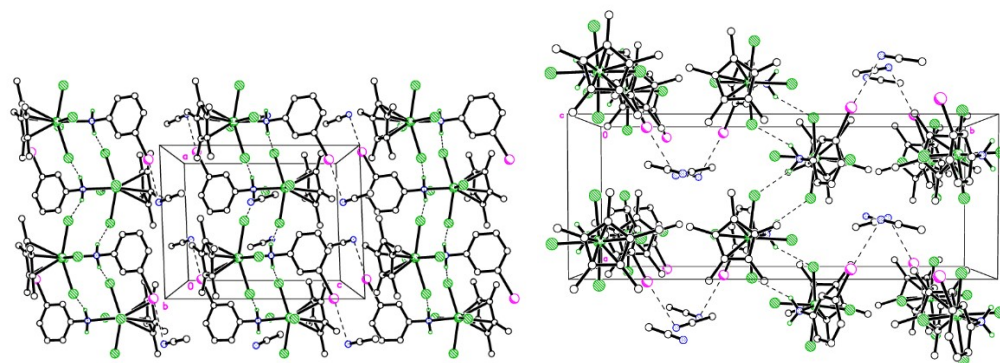

**Figure S4.** Packing views of **3**.

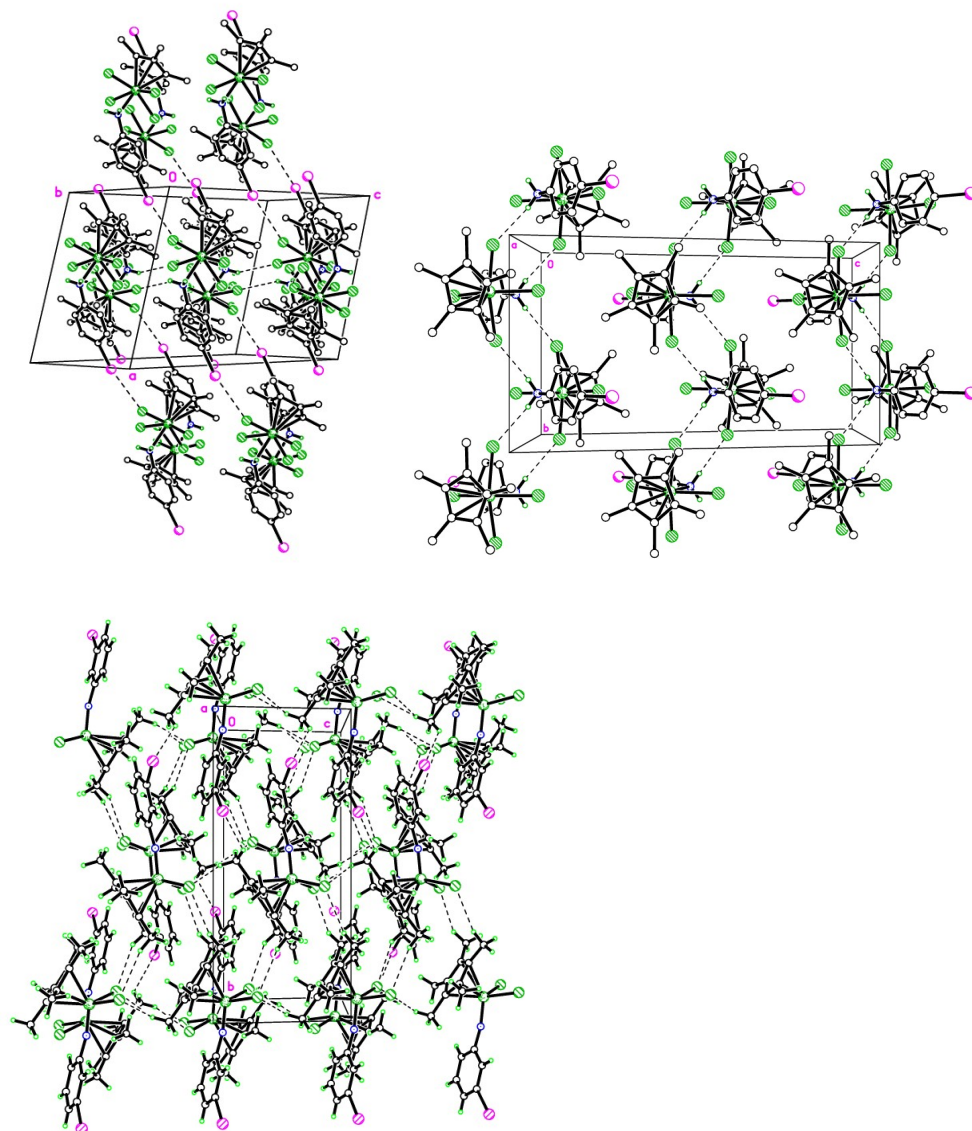

**Figure S5.** Different views of  $[3\text{-I-NH}_3\text{C}_6\text{H}_4]^+\text{Cl}^-$ .



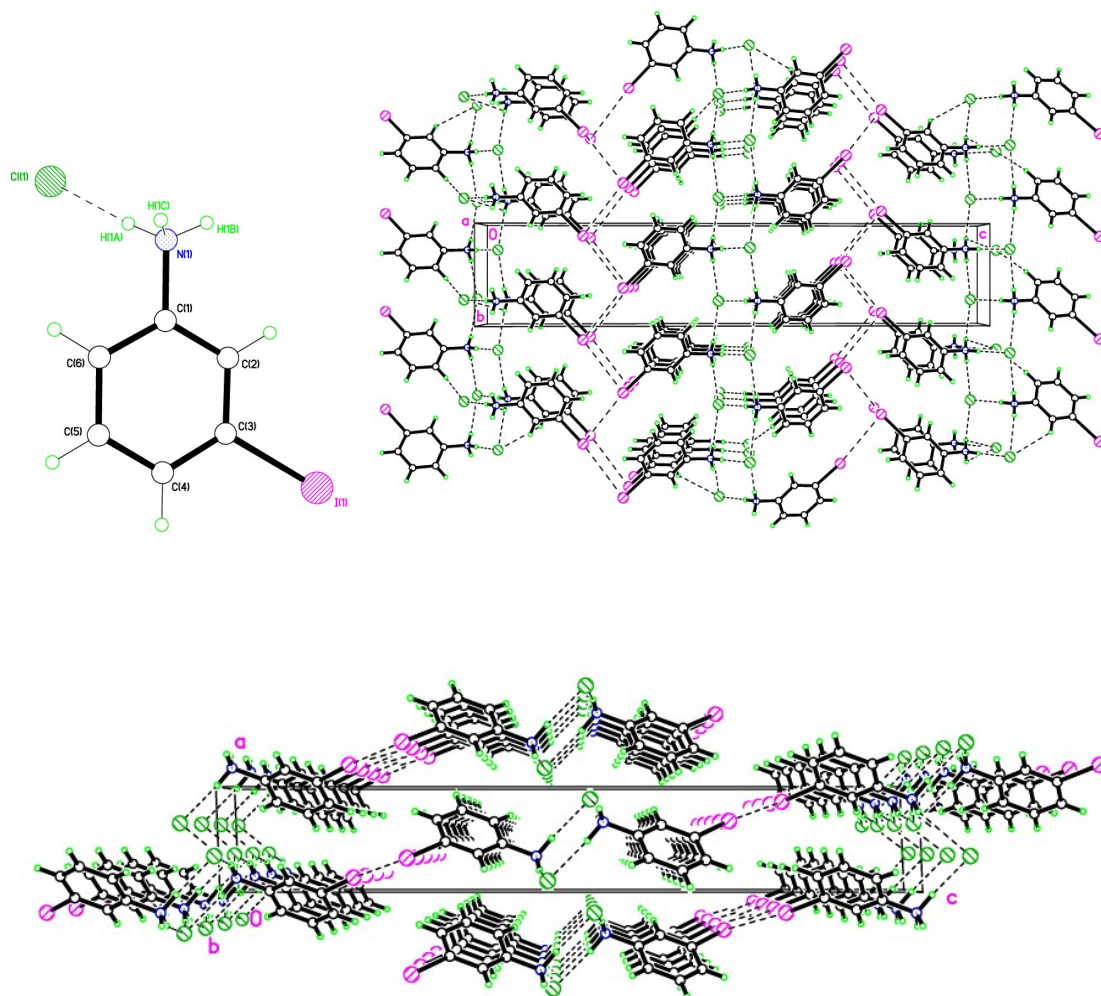

**Figure S6.** Different views of the packing of 4.

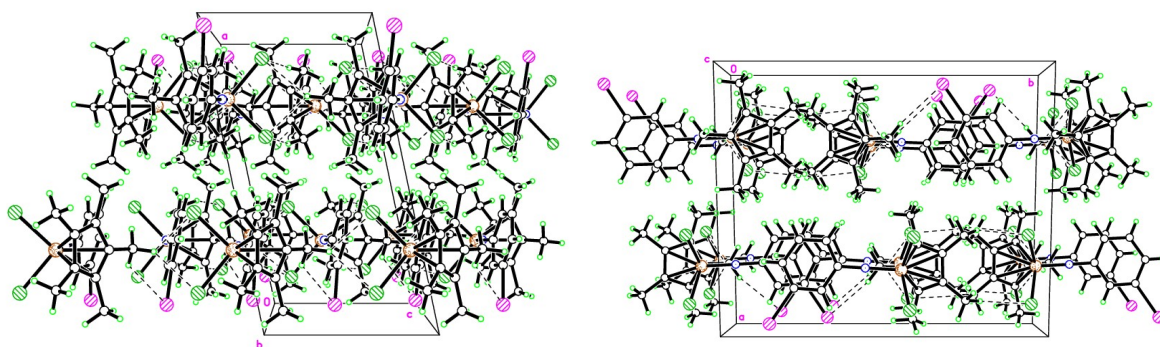

**Figure S7.** Packing of complex 5.

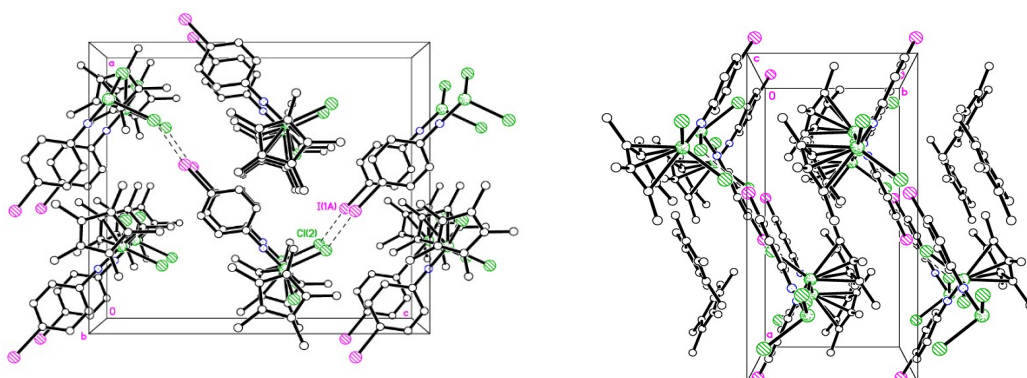

**Figure S8.** Alternative view and packing of 6·MeCN

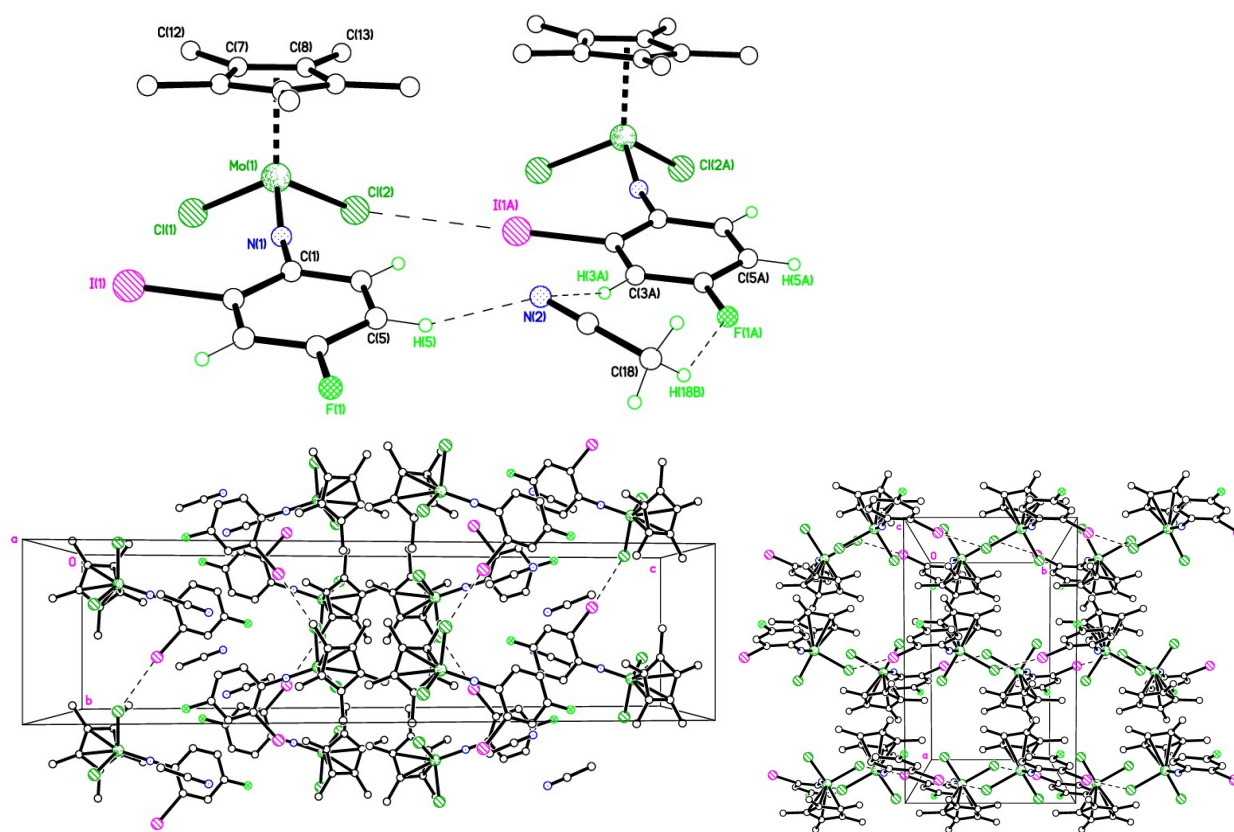

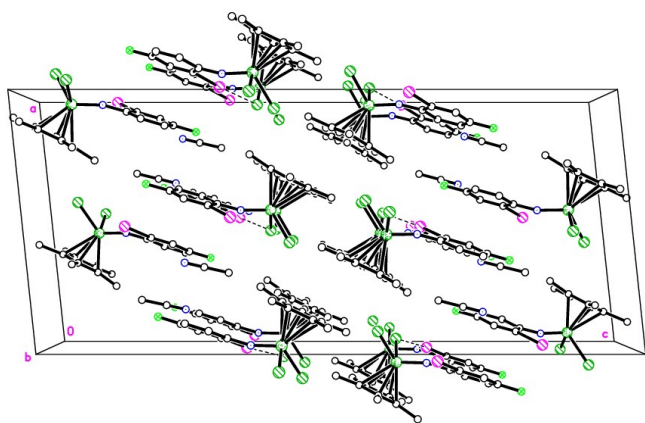

**Figure S9.** Packing of complex 7.

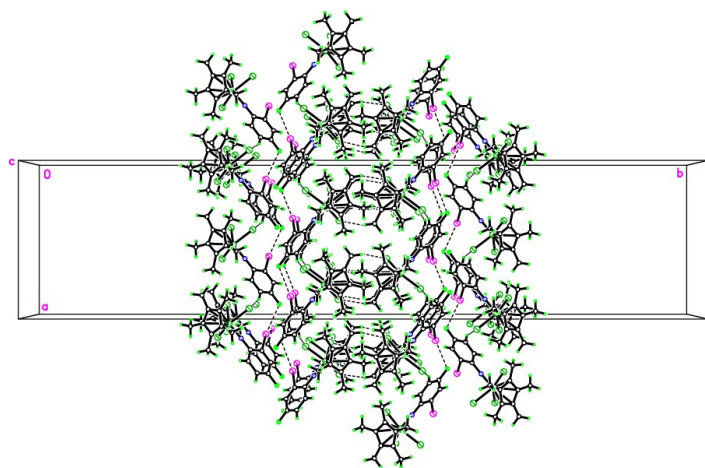

**Figure S10.** Packing of aniline complex 8.

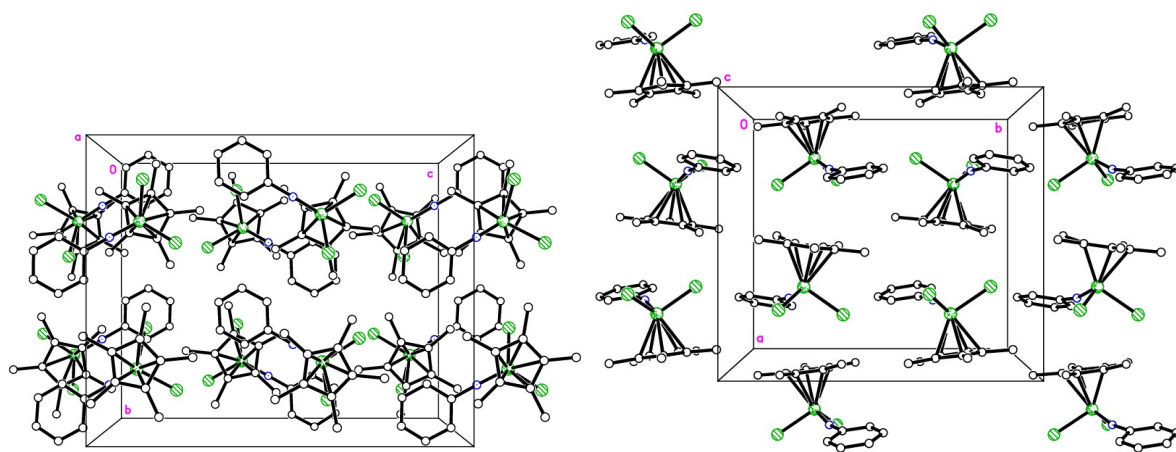

**Figure S11.**  $^1\text{H}$  NMR spectrum ( $\text{CDCl}_3$ , 400 MHz, 298 K) of the PCL synthesized with **3**/BnOH at 130 °C under  $\text{N}_2$  (entry 7, Table 1).



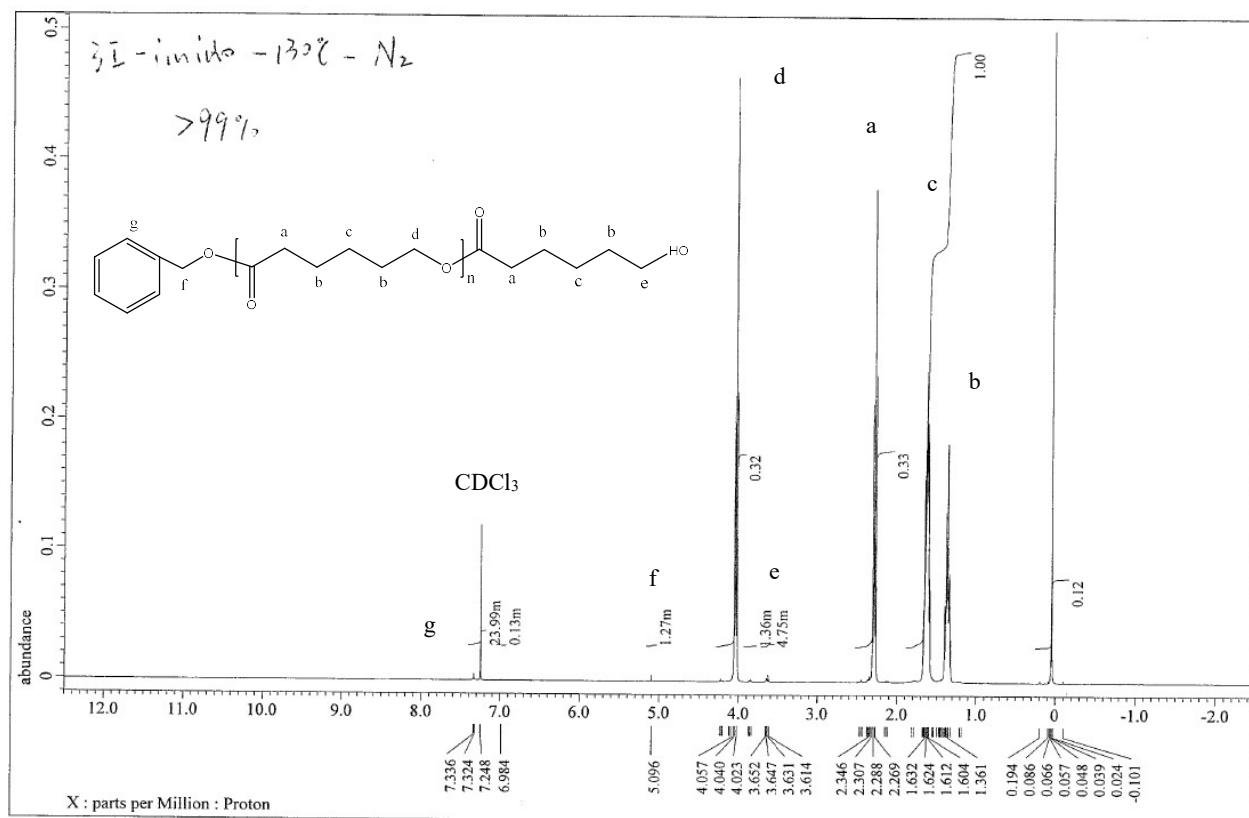

**Figure S12.** Mass spectrum of the PCL synthesized with 2/BnOH (entry 2, Table 1).

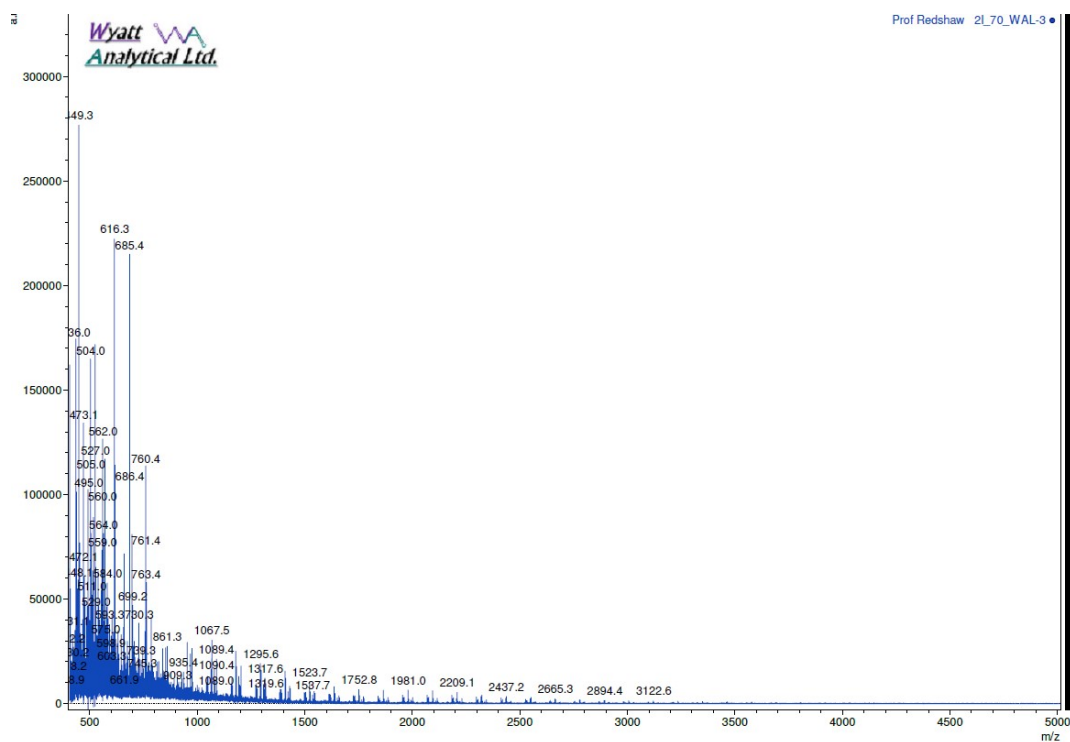

**Figure S13.** Mass spectrum of the PCL synthesized with **2**/BnOH (entry 2, Table 2).

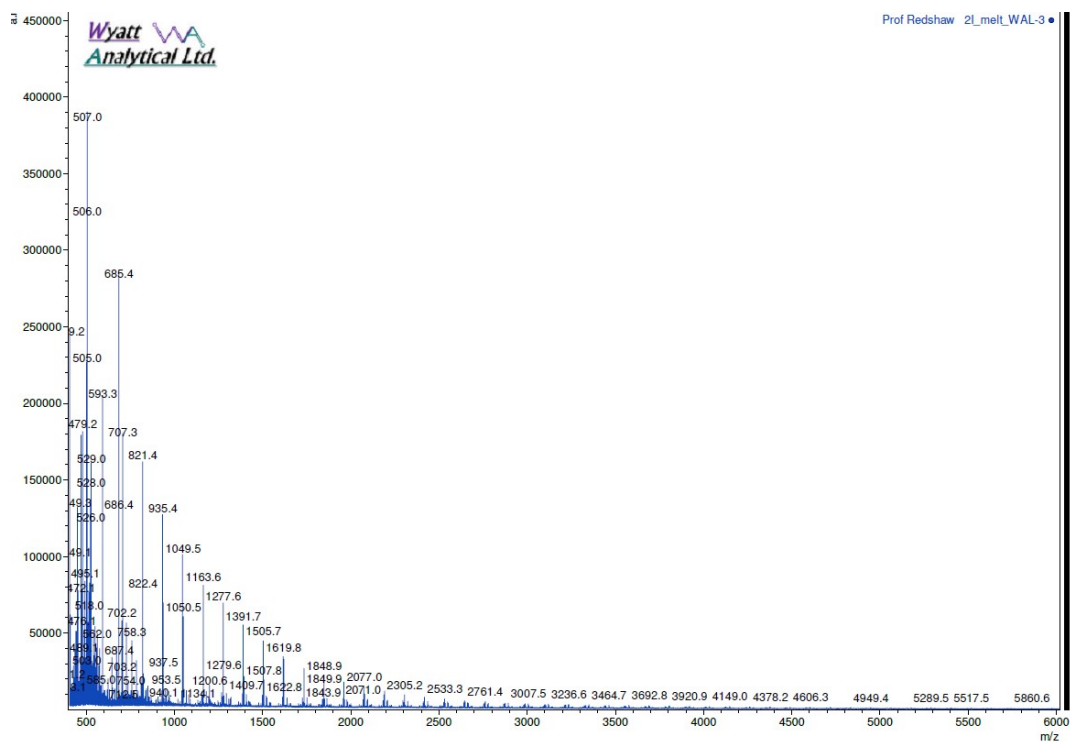

**Figure S14.** Mass spectrum of the PCL synthesized with **2**/BnOH (entry 5, Table 3).

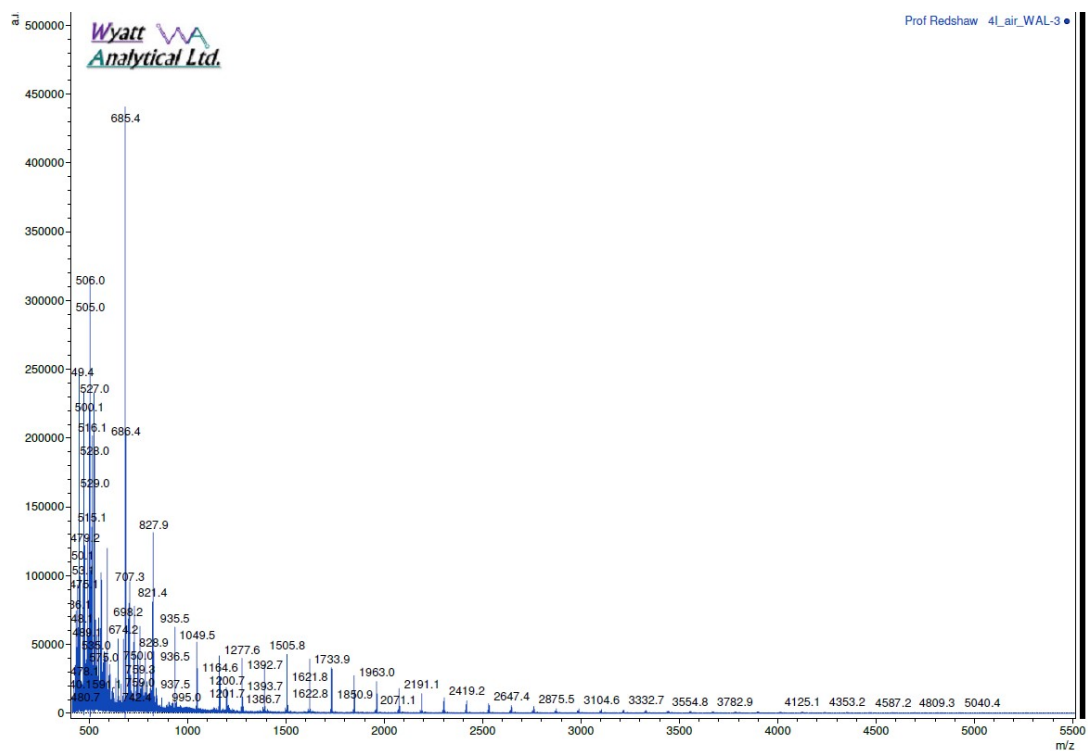

Figure S15. Kinetics for **8** versus **2**.

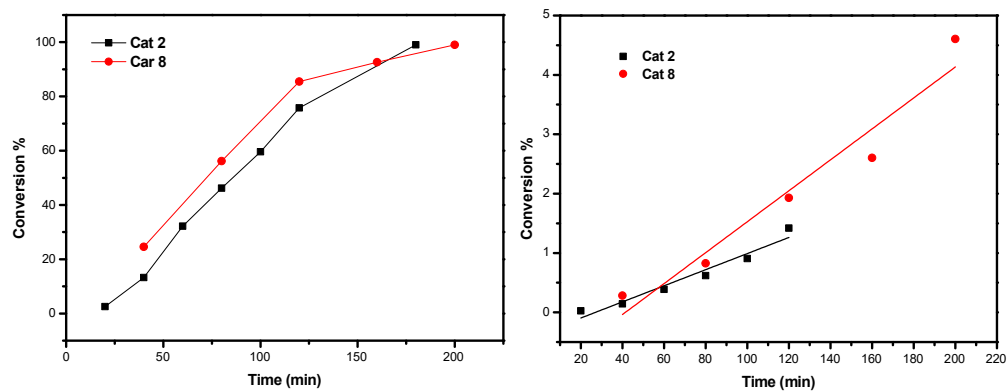

Supplement: s1 [file s1]
